# Supplementary material for: Novel 1, 4-dihydropyridines for L-type calcium channel as antagonists for cadmium toxicity
Source: PubMed Central journal article supplement (PMC5366925; doi:10.1038/srep45211), 2017-03-27
Supplement: srep45211-s1.pdf [file srep45211-s1.pdf]

# **Novel 1, 4-dihydropyridines for L-type calcium channel as antagonists for cadmium toxicity**

**Madhu Sudhana Saddala<sup>1</sup>, Ramesh Kandimalla<sup>2</sup>, Pradeepkiran Jangampalli Adi<sup>1,2</sup>,  
Sainath Sri Bhashyam<sup>3,4\*</sup>, Usha Rani Asupatri<sup>1\*</sup>**

<sup>1</sup>Sri Venkateswara University, Tirupati – 517502, A.P., India.

Division of Bioinformatics, DBT- Bioinformatics Centre,

Department of Zoology,

<sup>2</sup>Garrison Institute on Aging, Texas Tech University of Health Science Centre, Lubbock, USA.

<sup>3</sup>CIMAR/CIIMAR, Centro Interdisciplinar de Investigação Marinha e Ambiental,

Universidade do Porto, Rua dos Bragas, 177, 4050-123 Porto, Portugal.

<sup>4</sup>Vikrama Simhapuri University, Nellore-524 003, Andhra Pradesh,

India.

Supporting Information:

|                    |                                                                            |
|--------------------|----------------------------------------------------------------------------|
| <b>KcsA</b>        |                                                                            |
| M1                 | AGAATVLLVIVVLLAGSYLA 47                                                    |
| <b>CAC1C_HUMAN</b> |                                                                            |
| IS5                | IALLVLFVIIYAIIGLELF 290                                                    |
| IIS5               | LLLLFLFIIIFSLLGMQLF 673                                                    |
| IIIS5              | VIV <u>T</u> LL <u>Q</u> FMFACIGVQLF 1071                                  |
| IVS5               | ALLIVMLFFIYAVIGMQVF 1430                                                   |
| <br>               |                                                                            |
| <b>KcsA</b>        |                                                                            |
| P                  | ITYPRALWWSVETATTVGYGD 80                                                   |
| <b>CAC1C_HUMAN</b> |                                                                            |
| IP                 | DNFAFAMLTVFQCITME <u>E</u> GWTD 367                                        |
| IIP                | DNFPQSLLTVFQILTGEDWNS 710                                                  |
| IIIP               | DNVLAAMMALFTV <u>S</u> <u>T</u> <u>F</u> EGWPE 1138                        |
| IVP                | QTFPQAVLLLFRCATGE <u>E</u> AWQE 1468                                       |
| <br>               |                                                                            |
| <b>KcsA</b>        |                                                                            |
| M2                 | WGRCVAVVVMVAGITSFGLVTAALAT 112                                             |
| <b>CAC1C_HUMAN</b> |                                                                            |
| IS6                | WPWIYFVTLIIIGSFFVLNLVLGVLS 405                                             |
| IIS6               | LVCIFYFIILFICGNYILLNVFLAIAV 753                                            |
| IIIS6 (MODEL A)    | VEISIFFII <u>Y</u> IIII <u>I</u> A <u>F</u> <u>M</u> <u>M</u> NIFVGFV 1185 |
| IIIS6 (MODEL B)    | EISIFFII <u>Y</u> IIII <u>I</u> A <u>F</u> <u>M</u> <u>M</u> NIFVGFVI 1186 |
| IVS6               | FAVFYFISF <u>Y</u> MLCAFLI <u>I</u> NLNFVAVIM 1524                         |

**Figure S1:** Pairwise alignment of CAC1C\_HUMAN and KcsA sequences. The conserved key residues used to align the sequences are shown in red boxes. Residues reported to affect DHPs antagonist binding and underscored and highlighted in bold.

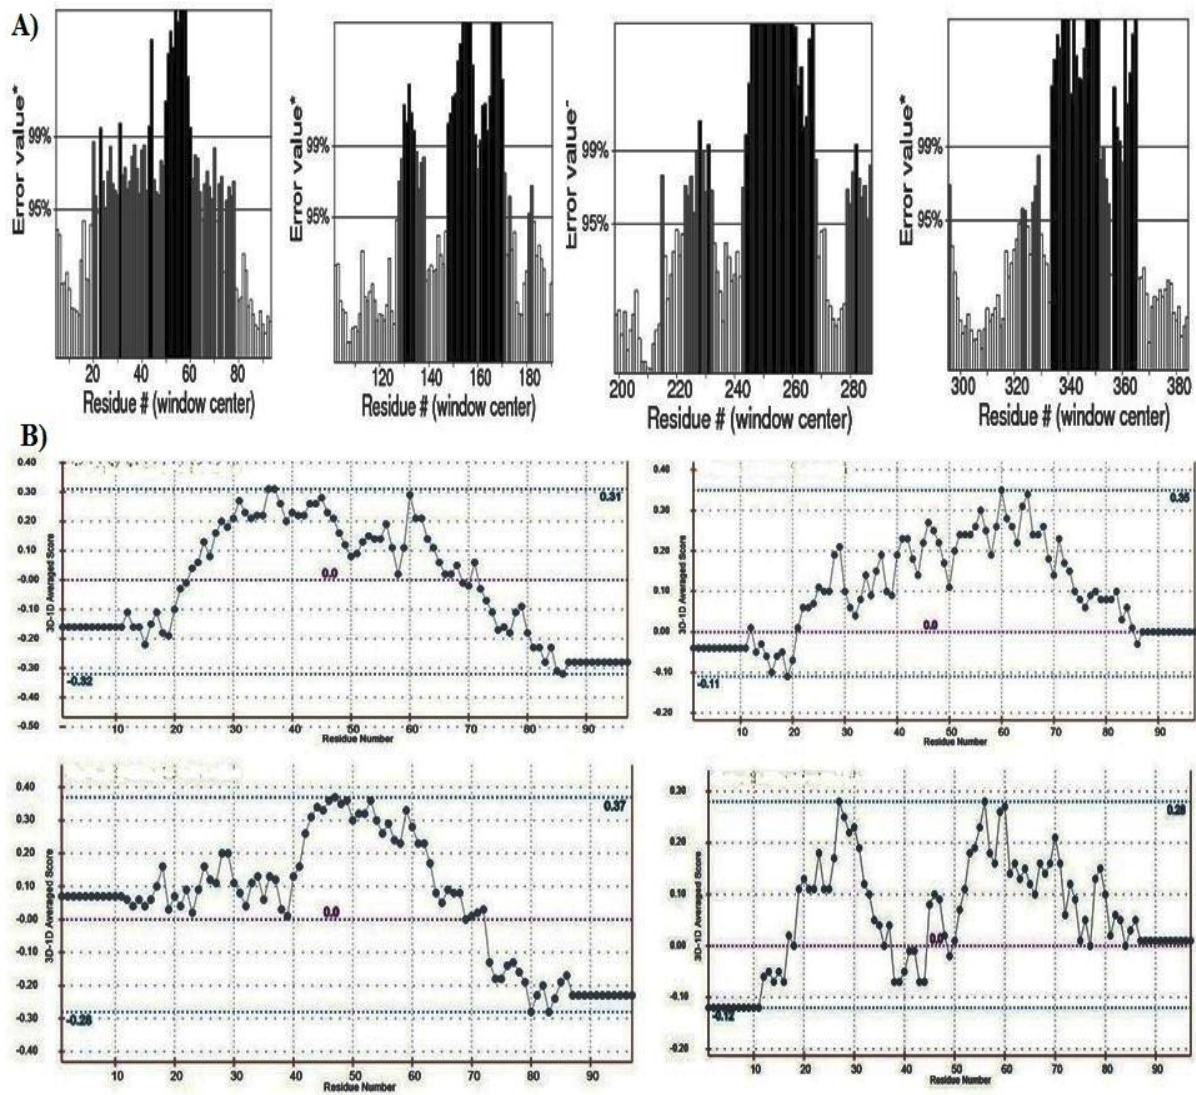

**Figure S2:** A) ERRAT score of the LCC model (four repeats) B) Verify3Dscore profile calculated for LCC model. Scores over 0.2 indicate a high quality model.

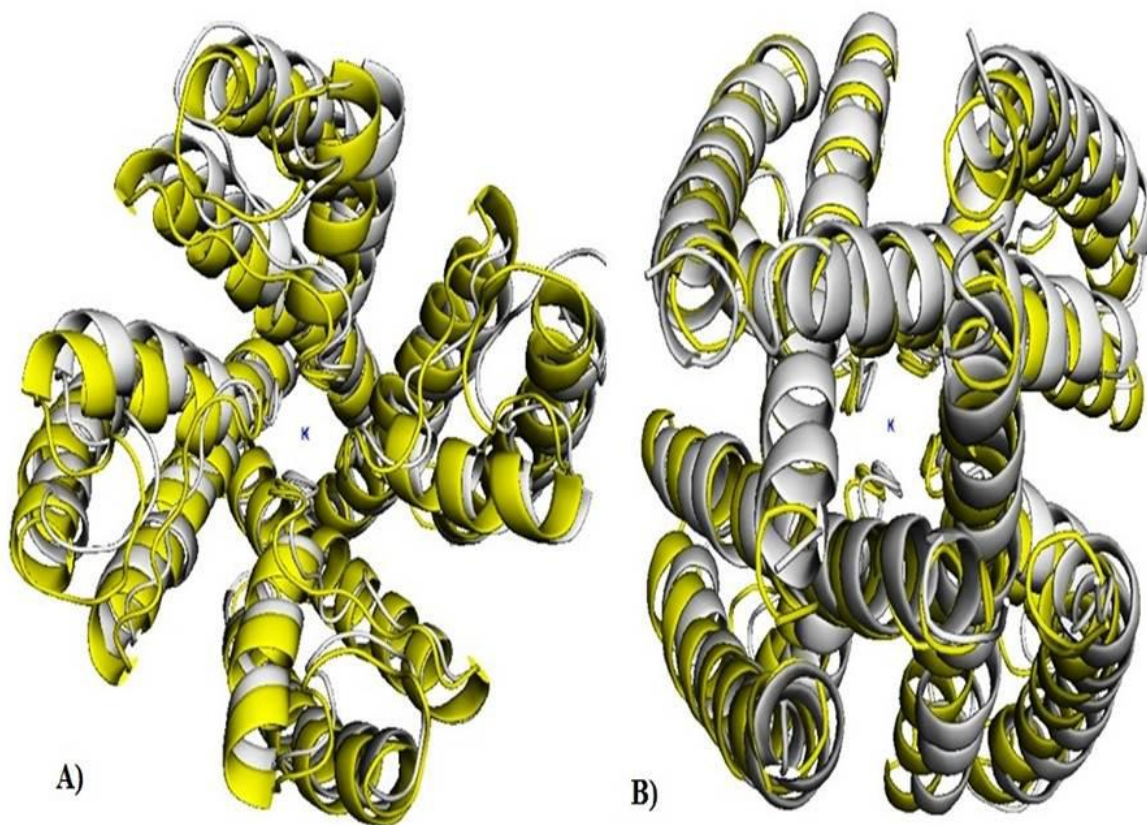

**Figure S3:** Superimposition of the LCC model (white) and KcsA (yellow) (PDB: 3BPM). (A) Open conformation, (B) Closed conformation.

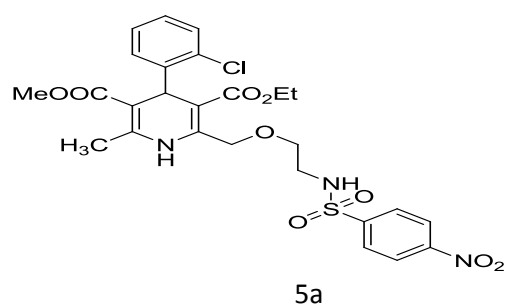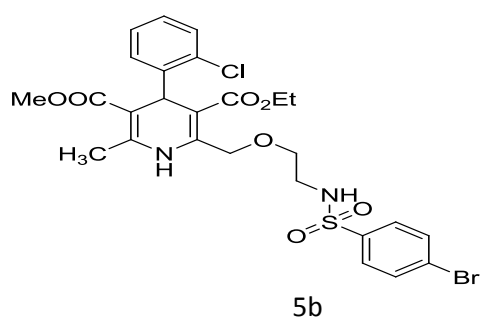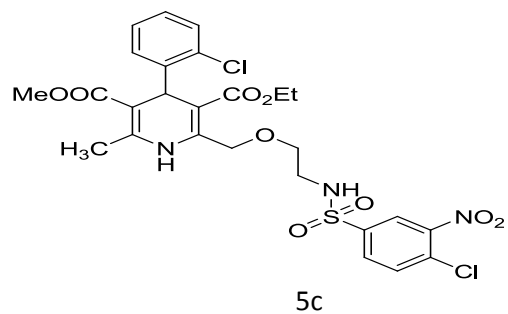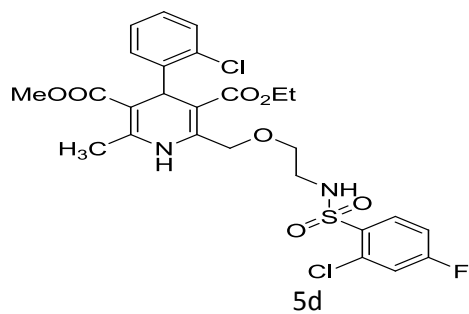

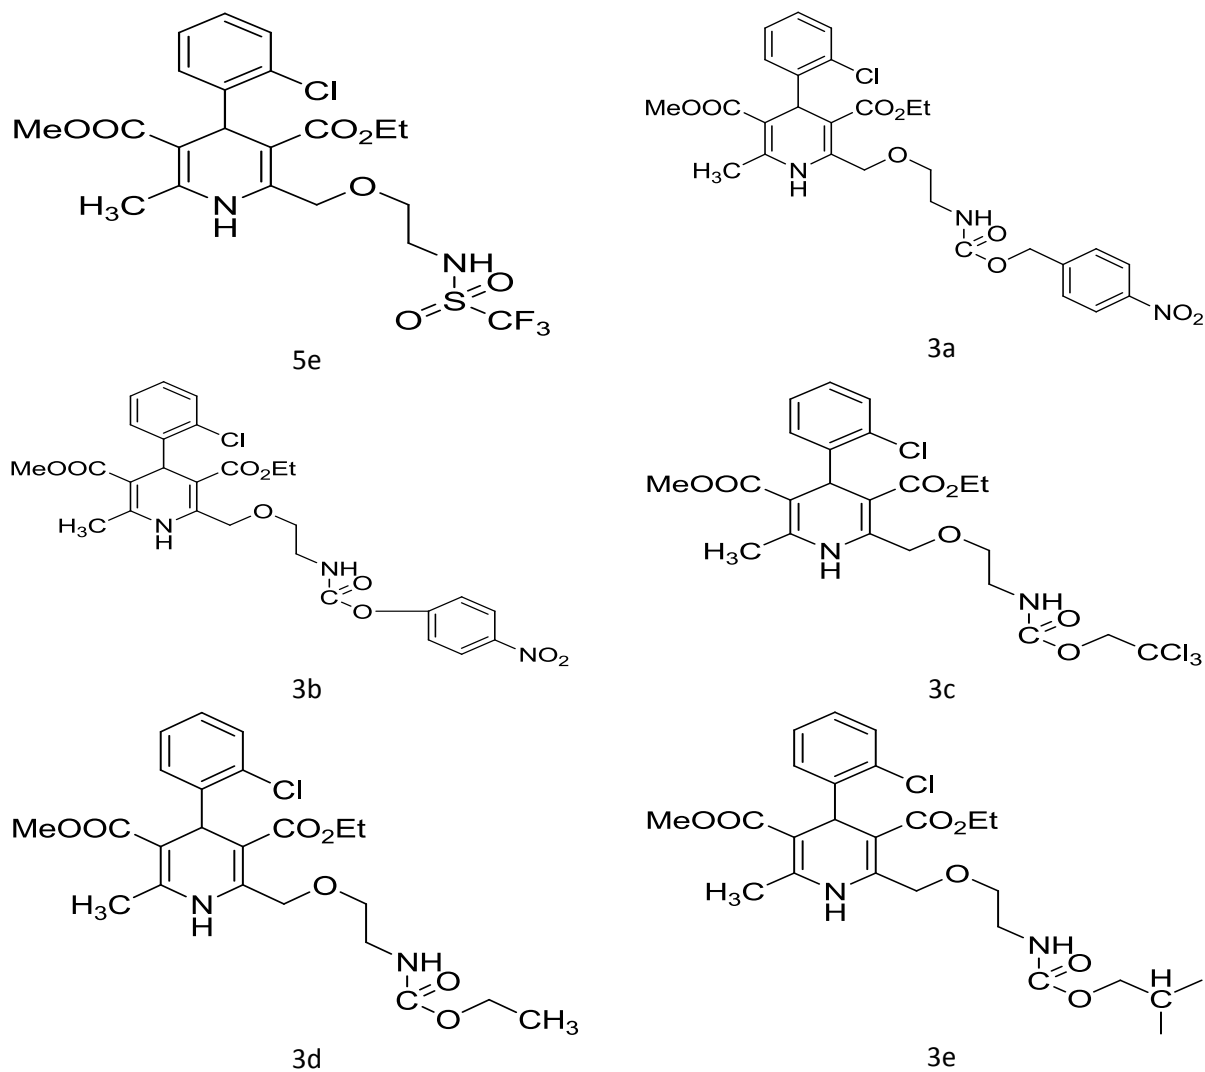

**Figure S4:** The synthesized calcium channel blocker (CCB) structures were built with standard bond length and angles using ChemSketch.

### Spectral data

#### **3-Ethyl 5-methyl 4-(2-chlorophenyl)-2-((2-((4-nitrophenethoxy) carbonylamino) ethoxy) methyl)-1,4-dihydro pyridine-3,5-dicarboxylate (3a).**

Yield 73%. mp 122-124 °C.  $\nu_{\text{max}}$  (KBr,  $\text{cm}^{-1}$ ): 3240 (-NH), 1748 (-C=O).  $^1\text{H-NMR}$  (400 MHz,  $\text{CDCl}_3$ )  $\delta$  (ppm): 8.24 (s, 1H, Ar-NH), 7.58-6.92 (m, 5H, Ar-H), 2.12 (3H, s, -CH<sub>3</sub>), 3.14 (3H, s, -OCH<sub>3</sub>), 4.16 (2H, q, -OCH<sub>2</sub>), 1.42 (3H, t, -CH<sub>3</sub>), 4.06 (2H, s, -OCH<sub>2</sub>), 3.72 (2H, t, -OCH<sub>2</sub>), 3.12 (2H, q, -CH<sub>2</sub>-NH), 5.74 (1H, t, -NH-C=O), 5.68 (2H, s, -CH<sub>2</sub>-Ar), 7.52 (2H, d, Ar'-H), 8.19 (2H, d, Ar'-H).  $^{13}\text{C NMR}$  (100 MHz,  $\text{CDCl}_3$ )  $\delta$ : 144.5 (C-2), 102.4 (C-3), 37.2 (C-4), 109.4 (C-5), 136.8 (C-6), 19.2 (C-7), 143.2 (C-8), 126.4 (C-9), 127.1 (C-10), 128.4 (C-11), 128.6 (C-12), 131.6 (C-13), 167.4 (C-14), 54.3 (C-16), 167.5 (C-17), 62.4 (C-19), 15.2 (C-20), 70.4 (C-21), 68.6 (C-23), 41.4 (C-24), 155.4 (C-26), 65.6 (C-27), 141.2 (C-1'), 128.2 (C-2'), 124.2 (C-3'), 146.2 (C-4'). LC MS:  $m/z$  (%) 587.17 [100, M]<sup>+</sup>, 589 [65, M+2]<sup>+</sup>. Anal. calcd. for  $\text{C}_{28}\text{H}_{30}\text{ClN}_3\text{O}_9$ : C, 57.19; H, 5.14; N, 7.15; Found: C, 57.12, H, 5.09; N, 7.11.

**3-Ethyl 5-methyl 4-(2-chlorophenyl)-2-((2-((4-nitrophenoxy)carbonylamino) ethoxy)methyl)-1,4-dihydro pyridine-3,5-dicarboxylate (3b).**

Yield 72%. mp 132-134 °C.  $\nu_{\text{max}}$  (KBr, cm<sup>-1</sup>): 3258 (-NH), 1720 (-C=O). <sup>1</sup>H-NMR (400 MHz, CDCl<sub>3</sub>)  $\delta$  (ppm): 8.16(s, 1H, Ar-NH), 7.54-6.96 (m, 5H, Ar-H), 2.16 (3H, s, -CH<sub>3</sub>), 3.18 (3H, s, -OCH<sub>3</sub>), 4.22 (2H, q, -OCH<sub>2</sub>), 1.54 (3H, t, -CH<sub>3</sub>), 4.15 (2H, s, -OCH<sub>2</sub>), 3.64 (2H, t, -OCH<sub>2</sub>), 3.24 (2H, q, -CH<sub>2</sub>-NH), 5.72 (1H, t, -NH-C=O), 7.58 (2H, d, Ar'-H), 8.26 (2H, d, Ar'-H). <sup>13</sup>C NMR (100 MHz, CDCl<sub>3</sub>)  $\delta$ : 144.2 (C-2), 101.5 (C-3), 36.6 (C-4), 109.4 (C-5), 136.2 (C-6), 19.4 (C-7), 142.6 (C-8), 127.2 (C-9), 126.9 (C-10), 128.5 (C-11), 129.2 (C-12), 131.4 (C-13), 166.2 (C-14), 54.5 (C-16), 168.2 (C-17), 61.9 (C-19), 15.8 (C-20), 70.2 (C-21), 68.6 (C-23), 41.2 (C-24), 151.2 (C-26), 156.2 (C-1'), 122.2 (C-2'), 125.2 (C-3'), 144.5 (C-4'). LC MS: m/z (%) 573 [100, M]<sup>+</sup>, 575 [65, M+2] <sup>+</sup>. Anal.cald.for C<sub>27</sub>H<sub>28</sub>ClN<sub>3</sub>O<sub>9</sub>: C, 56.50; H, 4.92; N, 7.32; Found: C, 56.48, H, 4.86; N, 7.28.

**3-Ethyl 5-methyl 4-(2-chlorophenyl)-2-((2,2,2-trichloroethoxy)carbonylamino)ethoxymethyl)-1,4-dihydro pyridine-3,5-dicarboxylate (3c).**

Yield 80%. mp 154-156 °C.  $\nu_{\text{max}}$  (KBr, cm<sup>-1</sup>): 3236 (-NH), 1760 (-C=O). <sup>1</sup>H-NMR (400 MHz, CDCl<sub>3</sub>)  $\delta$  (ppm): 8.26(s, 1H, Ar-NH), 7.62-6.90 (m, 5H, Ar-H), 2.24 (3H, s, -CH<sub>3</sub>), 3.21 (3H, s, -OCH<sub>3</sub>), 4.26 (2H, q, -OCH<sub>2</sub>), 1.58 (3H, t, -CH<sub>3</sub>), 4.19 (2H, s, -OCH<sub>2</sub>), 3.60 (2H, t, -OCH<sub>2</sub>), 3.24 (2H, q, -CH<sub>2</sub>-NH), 5.78 (1H, t, -NH-C=O), 5.24 (2H, s, -OCH<sub>2</sub>). <sup>13</sup>C NMR (100 MHz, CDCl<sub>3</sub>)  $\delta$ : 144.6 (C-2), 102.4 (C-3), 36.8 (C-4), 109.8 (C-5), 136.6 (C-6), 19.2 (C-7), 142.8 (C-8), 127.5 (C-9), 127.2 (C-10), 128.6 (C-11), 129.6 (C-12), 131.6 (C-13), 166.6 (C-14), 54.8 (C-16), 168.8 (C-17), 61.2 (C-19), 15.6 (C-20), 70.5 (C-21), 66.4 (C-23), 41.5 (C-24), 153.4 (C-26), 71.2 (C-1'), 96.2 (C-2'). Anal.cald.for C<sub>23</sub>H<sub>26</sub>Cl<sub>4</sub>N<sub>2</sub>O<sub>7</sub>: C, 47.28; H, 4.49; N, 4.79; Found: C, 47.23, H, 4.45; N, 4.72.

**3-Ethyl 5-methyl 4-(2-chlorophenyl)-2-((2-(ethoxy carbonylamino) ethoxy)methyl)-1,4-dihydropyridine-3,5-dicarboxylate (3d).**

Yield 78%. mp 142-144 °C.  $\nu_{\text{max}}$  (KBr, cm<sup>-1</sup>): 3230 (-NH), 1756 (-C=O). <sup>1</sup>H-NMR (400 MHz, CDCl<sub>3</sub>)  $\delta$  (ppm): 8.32(s, 1H, Ar-NH), 7.48-7.02 (m, 5H, Ar-H), 2.20 (3H, s, -CH<sub>3</sub>), 3.32 (3H, s, -OCH<sub>3</sub>), 4.21 (2H, q, -OCH<sub>2</sub>), 1.45 (3H, t, -CH<sub>3</sub>), 4.14 (2H, s, -OCH<sub>2</sub>), 3.54 (2H, t, -OCH<sub>2</sub>), 3.36 (2H, q, -CH<sub>2</sub>-NH), 5.78 (1H, t, -NH-C=O), 4.26 (2H, q, -OCH<sub>2</sub>), 1.42 (3H, t, -CH<sub>3</sub>); <sup>13</sup>C NMR (100 MHz, CDCl<sub>3</sub>)  $\delta$ : 144.2 (C-2), 103.2 (C-3), 36.4 (C-4), 109.6 (C-5), 136.4 (C-6), 19.5 (C-7), 142.5 (C-8), 127.2 (C-9), 126.8 (C-10), 127.8 (C-11), 129.4 (C-12), 131.2 (C-13), 166.9 (C-14), 54.4 (C-16), 168.2 (C-17), 61.6 (C-19), 15.2 (C-20), 71.2 (C-21), 66.5 (C-23), 40.6 (C-24), 155.6 (C-26), 61.2 (C-1'), 13.7 (C-2'). Anal.cald.for C<sub>23</sub>H<sub>29</sub>ClN<sub>2</sub>O<sub>7</sub>: C, 57.44; H, 6.08; N, 5.82; Found: C, 57.38, H, 6.02; N, 5.78.

**3-Ethyl 5-methyl 4-(2-chlorophenyl)-2-((2-(isobutoxycarbonylamino)ethoxy)methyl)-1,4-dihydropyridine-3,5-dicarboxylate (3e).**

Yield 74%. mp 166-168 °C.  $\nu_{\text{max}}$  (KBr, cm<sup>-1</sup>): 3256 (-NH), 1752 (-C=O). <sup>1</sup>H-NMR (400 MHz, CDCl<sub>3</sub>)  $\delta$  (ppm): 8.28(s, 1H, Ar-NH), 7.58-7.06 (m, 5H, Ar-H), 2.08 (3H, s, -CH<sub>3</sub>), 3.36 (3H, s, -OCH<sub>3</sub>), 4.18 (2H, q, -OCH<sub>2</sub>), 1.48 (3H, t, -CH<sub>3</sub>), 4.26 (2H, s, -OCH<sub>2</sub>), 3.62 (2H, t, -OCH<sub>2</sub>), 3.32 (2H, q, -CH<sub>2</sub>-NH), 5.80 (1H, t, -NH-C=O), 3.72 (2H, t, -OCH<sub>2</sub>), 1.92-1.88 (1H, m, -CH), 1.04 (6H, d, -(CH<sub>3</sub>)<sub>2</sub>). <sup>13</sup>C NMR (100 MHz, CDCl<sub>3</sub>)  $\delta$ : 145.2 (C-2), 102.5 (C-3), 36.1 (C-4), 109.2 (C-5), 136.6 (C-6), 19.7 (C-7), 142.4 (C-8), 127.4 (C-9), 126.2 (C-10), 127.4 (C-11), 129.2 (C-12), 131.4 (C-13), 166.3 (C-14), 54.2 (C-16), 167.4 (C-17), 61.2 (C-19), 15.6 (C-20), 71.4 (C-21), 66.5 (C-23), 40.6 (C-24), 152.8 (C-26), 71.2 (C-1'), 26.7 (C-2'), 20.1 (C-3'). LC MS: m/z (%) 508 [100, M]<sup>+</sup>, 410 [65, M+2] <sup>+</sup>. Anal.cald.for C<sub>25</sub>H<sub>33</sub>ClN<sub>2</sub>O<sub>7</sub>: C, 58.99; H, 6.53; N, 5.50; Found: C, 58.92, H, 6.48; N, 5.42.

**3-Ethyl 5-methyl 4-(2-chlorophenyl)-2-((2-(4-nitrophenylsulfonamido)ethoxy)methyl)-1,4-dihydropyridine-3,5-dicarboxylate (5a).**

Yield 75%. mp 142-144 °C.  $\nu_{\text{max}}$  (KBr, cm<sup>-1</sup>): 3262 (-NH), 1348 (-S=O). <sup>1</sup>H-NMR (400 MHz, CDCl<sub>3</sub>)  $\delta$  (ppm): 8.28(s, 1H, Ar-NH), 7.62-7.12 (m, 5H, Ar-H), 2.12 (3H, s, -CH<sub>3</sub>), 3.12 (3H, s, -OCH<sub>3</sub>), 4.25 (2H, q, -OCH<sub>2</sub>), 1.58 (3H, t, -CH<sub>3</sub>), 4.19 (2H, s, -OCH<sub>2</sub>), 3.52 (2H, t, -OCH<sub>2</sub>), 3.28 (2H, q, -CH<sub>2</sub>-NH), 3.22 (1H, t, -NH-SO<sub>2</sub>), 8.24 (2H, d, Ar'-H), 8.42 (2H, d, Ar'-H). <sup>13</sup>C NMR (100 MHz, CDCl<sub>3</sub>)  $\delta$ : 143.2 (C-2), 100.6 (C-3), 35.4 (C-4), 108.2 (C-5), 135.5(C-6), 18.8 (C-7), 141.8 (C-8), 126.4 (C-9), 125.2 (C-10), 127.2 (C-11), 128.5 (C-12), 130.2 (C-13), 165.4 (C-14), 54.2 (C-16), 162.4 (C-17), 62.4 (C-19), 15.6 (C-20), 69.1 (C-21), 68.4 (C-23), 41.6 (C-25), 152.4 (C-1'), 128.2 (C-2'), 124.2 (C-3'), 150.6 (C-4'). LC MS: m/z (%) 593 [100, M]<sup>+</sup>, 595 [65, M+2]<sup>+</sup>. Anal.cald.for C<sub>26</sub>H<sub>28</sub>ClN<sub>3</sub>O<sub>9</sub>S: C, 52.57; H, 4.75; N, 7.07; Found: C, 52.52, H, 4.70; N, 7.01.

**3-Ethyl 5-methyl 2-((2-(4-bromophenylsulfonamido)ethoxy)methyl)-4-(2-chlorophenyl)-1,4-dihydropyridine-3,5-dicarboxylate (5b).**

Yield 76%. mp 156-158 °C.  $\nu_{\text{max}}$  (KBr, cm<sup>-1</sup>): 3315 (-NH), 1352 (-S=O). <sup>1</sup>H-NMR (400 MHz, CDCl<sub>3</sub>)  $\delta$  (ppm): 8.20(s, 1H, Ar-NH), 7.56-7.02 (m, 5H, Ar-H), 2.06 (3H, s, -CH<sub>3</sub>), 3.14 (3H, s, -OCH<sub>3</sub>), 4.22 (2H, q, -OCH<sub>2</sub>), 1.54 (3H, t, -CH<sub>3</sub>), 4.20 (2H, s, -OCH<sub>2</sub>), 3.56 (2H, t, -OCH<sub>2</sub>), 3.22 (2H, q, -CH<sub>2</sub>-NH), 3.26 (1H, t, -NH-SO<sub>2</sub>), 7.92 (2H, d, Ar'-H), 8.04 (2H, d, Ar'-H). <sup>13</sup>C NMR (100 MHz, CDCl<sub>3</sub>)  $\delta$ : 144.5 (C-2), 101.6 (C-3), 37.2 (C-4), 107.4 (C-5), 136.2(C-6), 18.6 (C-7), 142.4 (C-8), 126.8 (C-9), 124.3 (C-10), 128.4 (C-11), 128.2 (C-12), 131.5 (C-13), 166.5 (C-14), 55.4 (C-16), 163.2 (C-17), 63.5 (C-19), 16.2 (C-20), 68.6 (C-21), 65.6 (C-23), 41.4 (C-25), 144.2 (C-1'), 129.4 (C-2'), 130.4 (C-3'), 128.2 (C-4'). LC MS: m/z (%) 626 [100, M]<sup>+</sup>, 628 [98, M+2]<sup>+</sup>. Anal.cald.for C<sub>26</sub>H<sub>28</sub>BrClN<sub>2</sub>O<sub>7</sub>S:C, 49.73; H, 4.49; N, 4.46; Found: C, 49.68, H, 4.43; N, 4.42.

**3-Ethyl 5-methyl 2-((2-(4-chloro-3-nitrophenylsulfonamido)ethoxy)methyl)-4-(2-chlorophenyl)-1,4-dihydropyridine-3,5-dicarboxylate (5c).**

Yield 79%. mp 169-171 °C.  $\nu_{\text{max}}$  (KBr, cm<sup>-1</sup>): 3354 (-NH), 1375 (-S=O). <sup>1</sup>H-NMR (400 MHz, CDCl<sub>3</sub>)  $\delta$  (ppm): 8.32(s, 1H, Ar-NH), 7.56-6.92 (m, 5H, Ar-H), 2.14 (3H, s, -CH<sub>3</sub>), 3.15 (3H, s, -OCH<sub>3</sub>), 4.20 (2H, q, -OCH<sub>2</sub>), 1.52 (3H, t, -CH<sub>3</sub>), 4.26 (2H, s, -OCH<sub>2</sub>), 3.52 (2H, t, -OCH<sub>2</sub>), 3.28 (2H, q, -CH<sub>2</sub>-NH), 3.25 (1H, t, -NH-SO<sub>2</sub>), 8.06 (1H, d, Ar'-H), 8.24 (1H, d, Ar'-H), 8.62 (1H, s, Ar'-H). <sup>13</sup>C NMR (100 MHz, CDCl<sub>3</sub>)  $\delta$ : 145.2 (C-2), 102.4 (C-3), 38.6 (C-4), 108.2 (C-5), 138.2 (C-6), 18.5 (C-7), 140.4 (C-8), 128.2 (C-9), 125.4 (C-10), 128.4 (C-11), 128.6 (C-12), 132.4 (C-13), 168.2 (C-14), 55.6 (C-16), 163.4 (C-17), 63.2 (C-19), 16.6 (C-20), 68.2 (C-21), 65.4 (C-23), 41.5 (C-25), 138.2(C-1'), 134.6 (C-2'), 130.4 (C-3'), 132.5 (C-4'), 146.2 (C-5'), 125.2 (C-6'). Anal.cald.for C<sub>26</sub>H<sub>27</sub>Cl<sub>2</sub>N<sub>3</sub>O<sub>9</sub>S: C, 49.69; H, 4.33; N, 6.69; Found: C, 49.64, H, 4.29; N, 6.62.

**3-Ethyl 5-methyl 4-(2-chlorophenyl)-2-((2-(4-fluorophenylsulfonamido) ethoxy)methyl) - 1,4-dihydropyridine-3,5-dicarboxylate (5d).**

Yield 70%. mp 176-178 °C.  $\nu_{\text{max}}$  (KBr, cm<sup>-1</sup>): 3342 (-NH), 1366 (-S=O). <sup>1</sup>H-NMR (400 MHz, CDCl<sub>3</sub>)  $\delta$  (ppm): <sup>1</sup>H-NMR(CDCl<sub>3</sub>)  $\delta$  (ppm): 8.28 (s, 1H, Ar-NH), 7.58-6.95 (m, 5H, Ar-H), 2.17 (3H, s, -CH<sub>3</sub>), 3.24 (3H, s, -OCH<sub>3</sub>), 4.26 (2H, q, -OCH<sub>2</sub>), 1.62 (3H, t, -CH<sub>3</sub>), 4.24 (2H, s, -OCH<sub>2</sub>), 3.52 (2H, t, -OCH<sub>2</sub>), 3.26 (2H, q, -CH<sub>2</sub>-NH), 3.21(1H, t, -NH-SO<sub>2</sub>), 7.96 (2H, d, Ar'-H), 7.52 (2H, d, Ar'-H). <sup>13</sup>C NMR (CDCl<sub>3</sub>)  $\delta$ : 144.2 (C-2), 102.4 (C-3), 37.5 (C-4), 107.2 (C-5), 136.6 (C-6), 18.8 (C-7), 142.8 (C-8), 126.6 (C-9), 124.8 (C-10), 127.6 (C-11), 127.8 (C-12), 131.2(C-13), 166.2 (C-14), 56.2 (C-16), 164.4 (C-17), 63.2 (C-19), 16.5 (C-20), 68.2 (C-21), 65.4 (C-23), 41.3 (C-25), 141.2 (C-1'), 130.8 (C-2'), 115.4 (C-3'), 166.5 (C-4'). Anal.cald.for C<sub>26</sub>H<sub>27</sub>Cl<sub>2</sub>FN<sub>2</sub>O<sub>7</sub>S: C, 51.92; H, 4.52; N, 4.66; Found: C, 51.88, H, 4.48; N, 4.61.

**3-Ethyl 5-methyl 4-(2-chlorophenyl)-2-((2-(trifluoromethylsulfonamido) ethoxy)methyl) - 1,4-dihydropyridine-3,5-dicarboxylate (5e).**

Yield 68%. mp 181-183 °C.  $\nu_{\text{max}}$  (KBr, cm<sup>-1</sup>): 3328 (-NH), 1372 (-S=O). <sup>1</sup>H-NMR (400 MHz, CDCl<sub>3</sub>)  $\delta$  (ppm): 8.32(s, 1H, Ar-NH), 7.52-6.94 (m, 5H, Ar-H), 2.15 (3H, s, -CH<sub>3</sub>), 3.38 (3H, s, -OCH<sub>3</sub>), 4.42 (2H, q, -OCH<sub>2</sub>), 1.68 (3H, t, -CH<sub>3</sub>), 4.34 (2H, s, -OCH<sub>2</sub>), 3.61 (2H, t, -OCH<sub>2</sub>), 3.28 (2H, q, -CH<sub>2</sub>-NH), 3.24 (1H, t, -NH-SO<sub>2</sub>). <sup>13</sup>C NMR(100MHz, CDCl<sub>3</sub>)  $\delta$ : 145.2 (C-2), 103.5 (C-3), 38.2 (C-4), 108.2 (C-5), 137.2 (C-6), 19.0 (C-7), 143.5 (C-8), 127.2(C-9), 125.2 (C-10), 128.2 (C-11), 129.2 (C-12), 134.4 (C-13), 167.2 (C-14), 57.2 (C-16), 166.4 (C-17), 64.4 (C-19), 16.7 (C-20), 69.4 (C-21), 65.6 (C-23), 41.8 (C-25), 150.2 (C-1'). LC MS m/z (%) 540 [100, M]<sup>+</sup>., 542 [65, M+2] <sup>+</sup>..Anal.cald.for C<sub>21</sub>H<sub>24</sub>ClF<sub>3</sub>N<sub>2</sub>O<sub>7</sub>S: C, 46.63; H, 4.47; N, 5.18; Found: C, 46.58, H, 4.42; N, 5.12.
